# Supplementary material
Source: PubMed Central journal article supplement (PMC4461532)
Supplement: NIHMS653592-supplement-01.pdf [file NIHMS653592-supplement-01.pdf]

**555 Supplemental Figure Legends**

556 **Figure S1. Experimental design of cutaneous VV inoculation using *ft/ft***  
557 **mice.** Back skin of mice were shaved and inoculated with  $10^7$  pfu VV/mouse by means  
558 of skin scarification. Mice were sacrificed after 7 days of VV inoculation and examined  
559 for clinical responses, viral load, serum levels of VV antibodies and cytokine production,  
560 as previously described<sup>30</sup>.

561 **Figure S2. VV specific systemic immune responses in *ft/ft* mice**  
562 **cutaneously inoculated with VV. A.** VV specific cytokine production by splenocytes  
563 after stimulation with VV infected A20 cells. **B.** Serum levels of VV specific IgG2a  
564 antibodies. The line in the box indicates median and the whiskers represent from the  
565 minimum to maximum (n = 5 per group). \*\*P < .01 and \*\*\*P < .001. ns, not significant.

566 **Figure S3. EV features in *ft/ft* mice are not influenced by the *ma* mutation.**  
567 **A-C.** Primary and satellite lesions in *ft/ft* mice homozygous for the *ma* mutation (*ft/ft*) or  
568 without the *ma* mutation (*ft/ft.ma<sup>wt/wt</sup>*) and WT controls inoculated with VV in shaved  
569 back skin. Gross appearance (A), area of primary lesions (B), and number of satellite  
570 lesions (C). Dashed circles indicate primary lesions. Arrows indicate satellite lesions. **D.**  
571 Viral load. **E-G.** H&E stained skin sections (200X magnification) (E), epidermal  
572 thickness (F), number of neutrophils (G), cytokine mRNA expression as fold induction  
573 relative to VV inoculated WT skin (H). Scale bars: 100  $\mu$ m. The line in the box indicates  
574 median and the whiskers represent from the minimum to maximum (n = 5 per group). \*P  
575 < .05, \*\*P < .01 and \*\*\*P < .001. ns, not significant.

576 **Figure S4. Histology and cytokine expression of skin topically sensitized**  
577 **with OVA in *ft/ft* mice. A.** H&E stained skin sections. **B.** Epidermal thickness. **C.**

578 Numbers of eosinophils. **D.** Cytokine mRNA expression expressed as fold induction  
579 relative to saline exposed WT skin. Scale bars: 100  $\mu\text{m}$ . **E.** Experimental plan of VV  
580 inoculation in topically sensitized skin. Mice were shaved and topically sensitized with  
581 OVA or saline for three one week-long cycles with 2 week rest intervals (total of 7  
582 weeks)<sup>18</sup> followed by inoculation of  $10^7$  pfu/mouse by means of skin scarification. Mice  
583 were sacrificed after 7 days of VV inoculation and examined for clinical responses, viral  
584 load, serum levels of VV antibodies and cytokine production, as previously described<sup>30</sup>.  
585 The line in the box indicates median and the whiskers represent from the minimum to  
586 maximum (n = 5 per group). \*P < .05, \*\*P < .01 and \*\*\*P < .001. ns, not significant. SAL,  
587 saline.

588 **Figure S5. VV specific IgG2a antibody response to cutaneous VV**  
589 **inoculation.** **A.** VV specific IgG2a levels in *ft/ft* mice and WT controls topically  
590 sensitized with OVA or saline. **B, C.** VV specific IgG2a levels in *ft/ft* and *ft/ftxll17a<sup>-/-</sup>* mice  
591 inoculated in unsensitized skin (B) or in skin topically sensitized with OVA or saline (C).  
592 The line in the box indicates median and the whiskers represent from the minimum to  
593 maximum (n = 5 per group). \*\*P < .01 and \*\*\*P < .001. ns, not significant. SAL, saline.

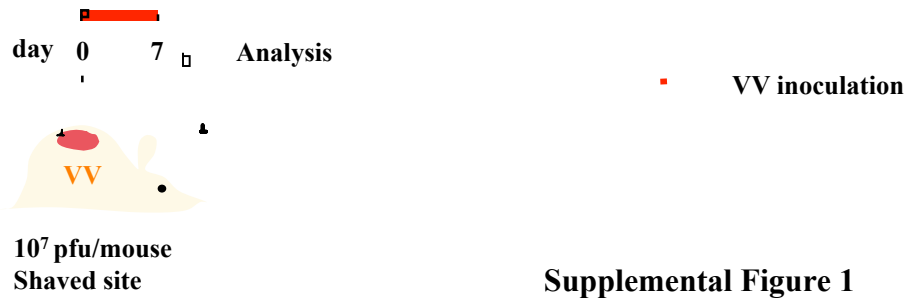

Supplemental Figure 1

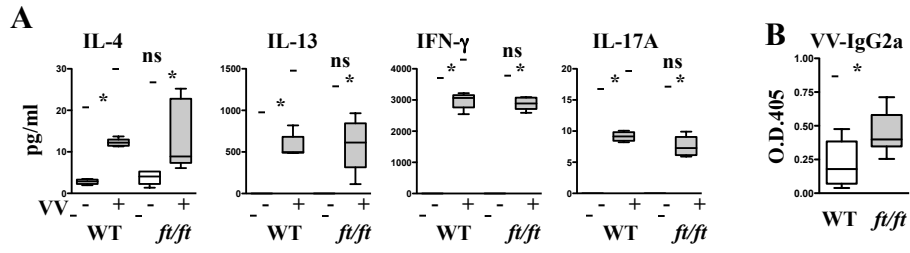

Supplemental Figure 2

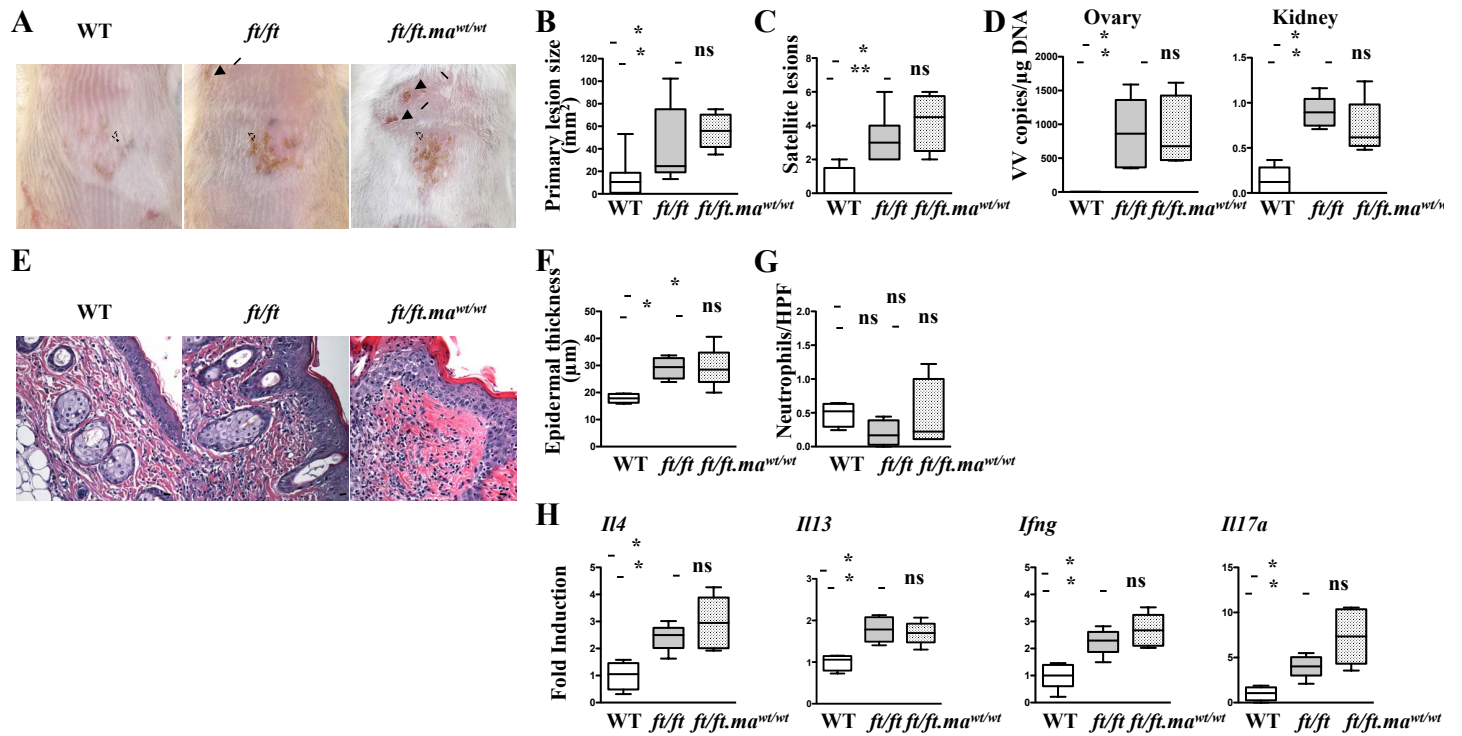

Supplemental Figure 3

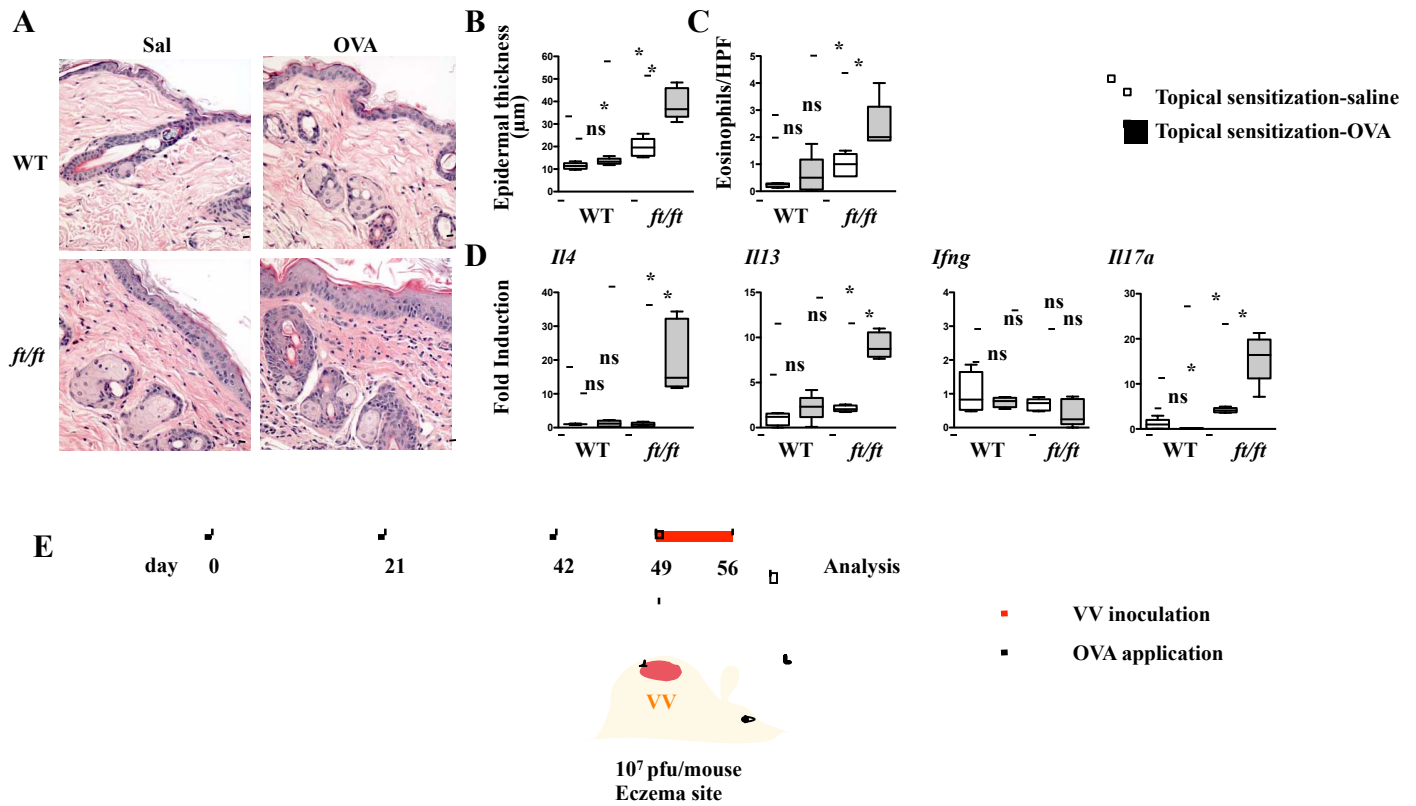

Supplemental Figure 4

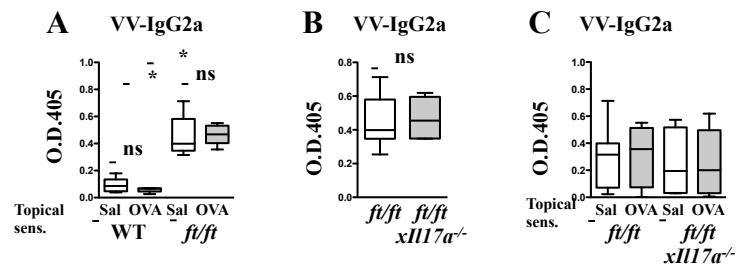

Supplemental Figure 5
